# Supplementary material
Source: Research Square preprint supplement (doi:10.21203/rs.3.rs-10067746/v1)
Supplement: Supplementary file 1 [file 6a4b003586d5100b59f19b0b.docx]

Supplementary Information

**Closed-loop design of 300 °C Al-Cu alloys via cross-condition knowledge transfer under extreme data scarcity**

**This file includes:**

Supplementary Figures, Tables and References of dataset.

Figs. 1 to 15

Tables. 1 to 11

Supplementary References 1 to 39

**Supplementary figures**


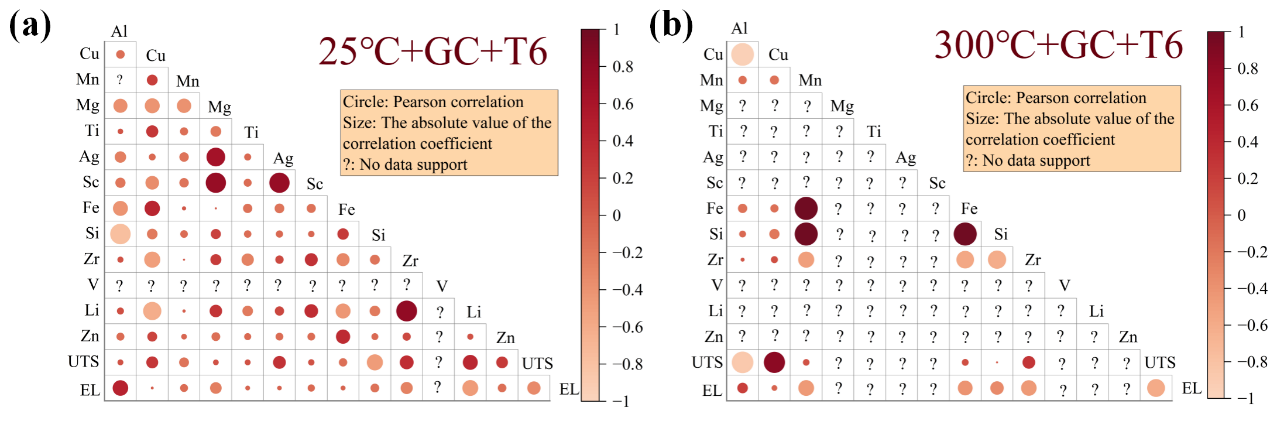


**Supplementary Fig. 1 | Pearson correlation heatmaps of alloy composition and mechanical performance under representative GC+T6 conditions.** **(a)** Pearson correlation heatmap for GC+T6 samples tested at 25 °C. **(b)** Pearson correlation heatmap for GC+T6 samples tested at 300 °C. Each cell represents the Pearson correlation between two alloying elements or between an alloying element and a mechanical-property metric. The color and circle size indicate the sign and magnitude of the correlation coefficient, respectively. “?” denotes correlations that could not be reliably determined because of insufficient data coverage.


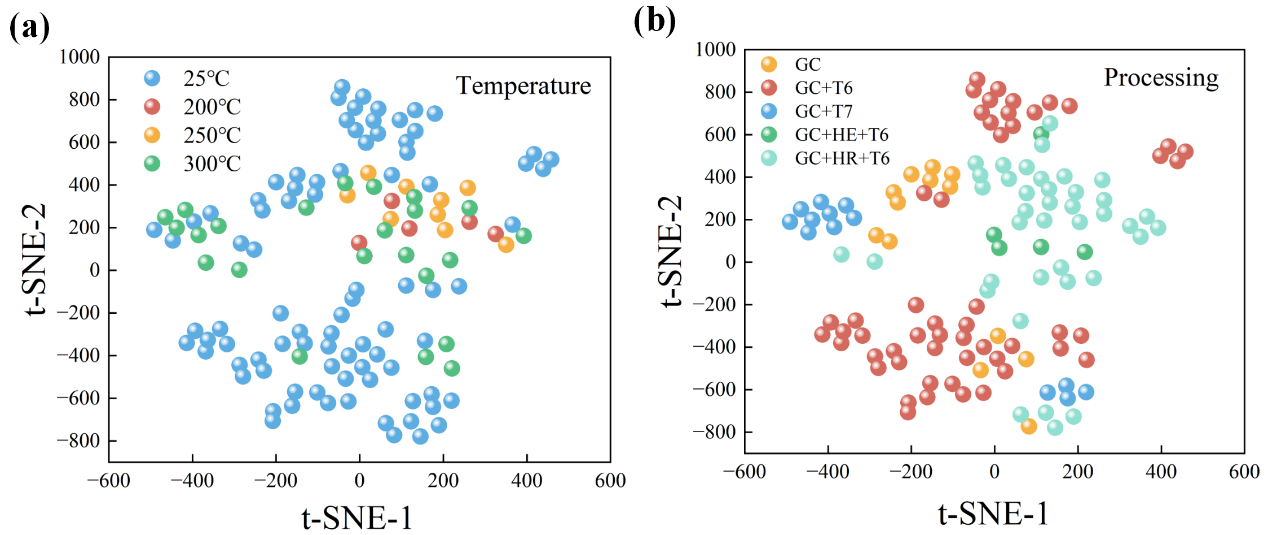


**Supplementary Fig. 2 | Two-dimensional t-SNE visualization of the cross-condition Al-Cu alloy database.** **(a)** Distribution of samples grouped by testing temperature. **(b)** Distribution of samples grouped by processing route. The partial overlap and interweaving among different temperature and processing subsets indicate that these conditions are not statistically isolated, but instead share local compositional neighborhoods and transferable composition-property information.


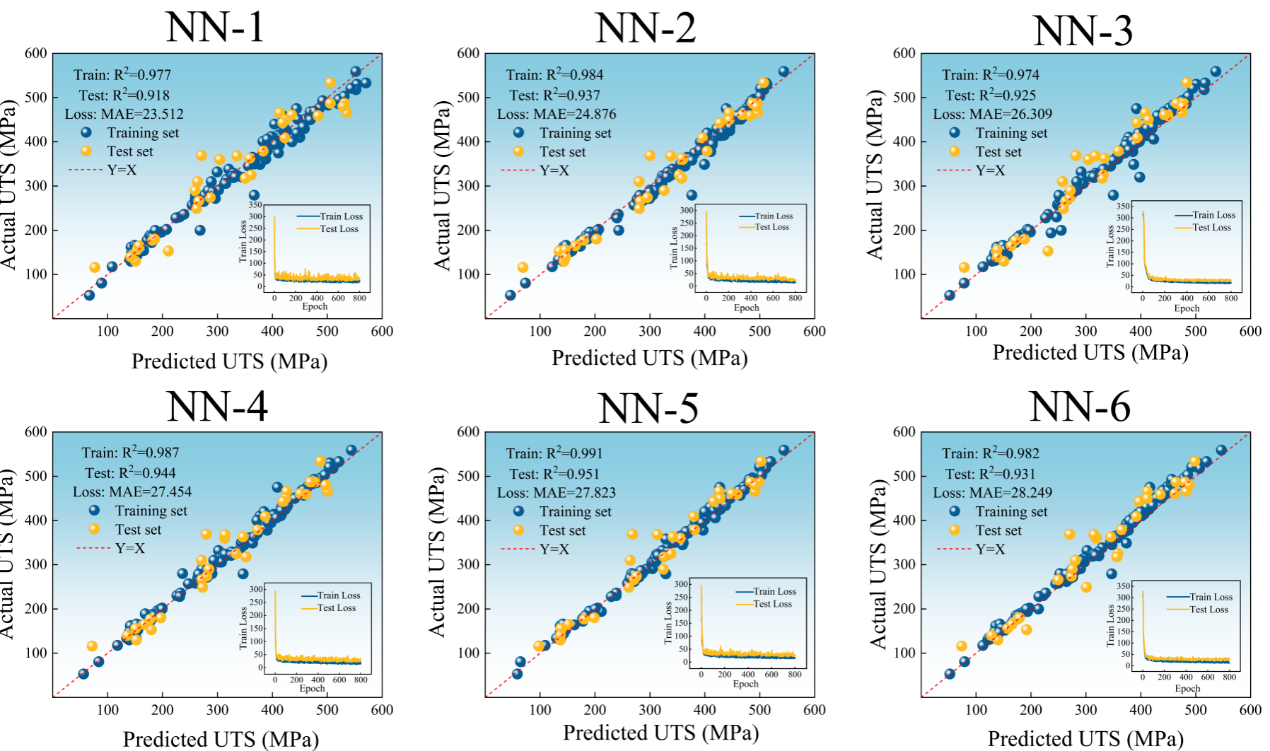


**Supplementary Fig. 3 | Training and testing performance of the top six NN-UTS models in the first iteration.** NN-1 to NN-6 denote neural-network models constructed using the first- to sixth-ranked hyperparameter sets identified by Bayesian optimization, respectively. In each panel, the predicted UTS values are plotted against the experimentally measured UTS values for the training and test sets. The inset shows the evolution of the training and test loss curves during model training.


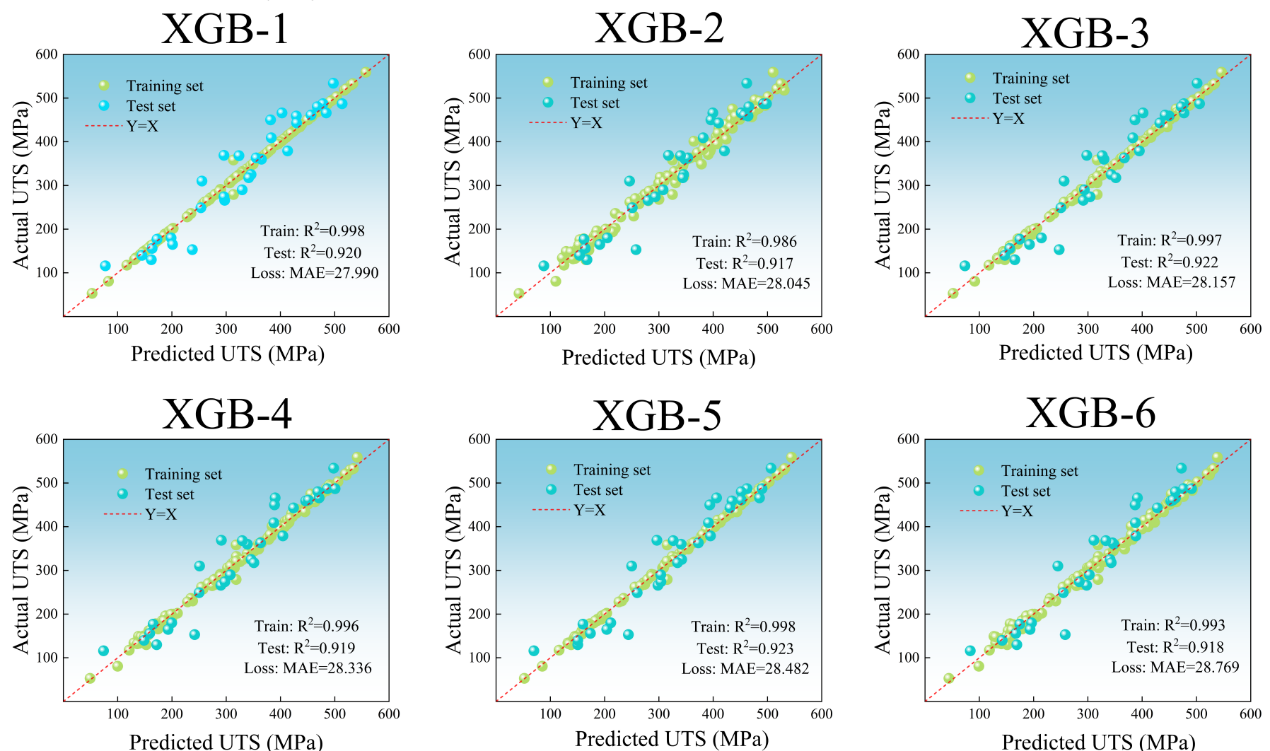


**Supplementary Fig. 4 | Training and testing performance of the top six XGBoost-UTS models in the first iteration.** XGB-1 to XGB-6 denote XGBoost models constructed using the first- to sixth-ranked hyperparameter sets identified by Bayesian optimization, respectively. In each panel, the predicted UTS values are plotted against the experimentally measured UTS values for the training and test sets.


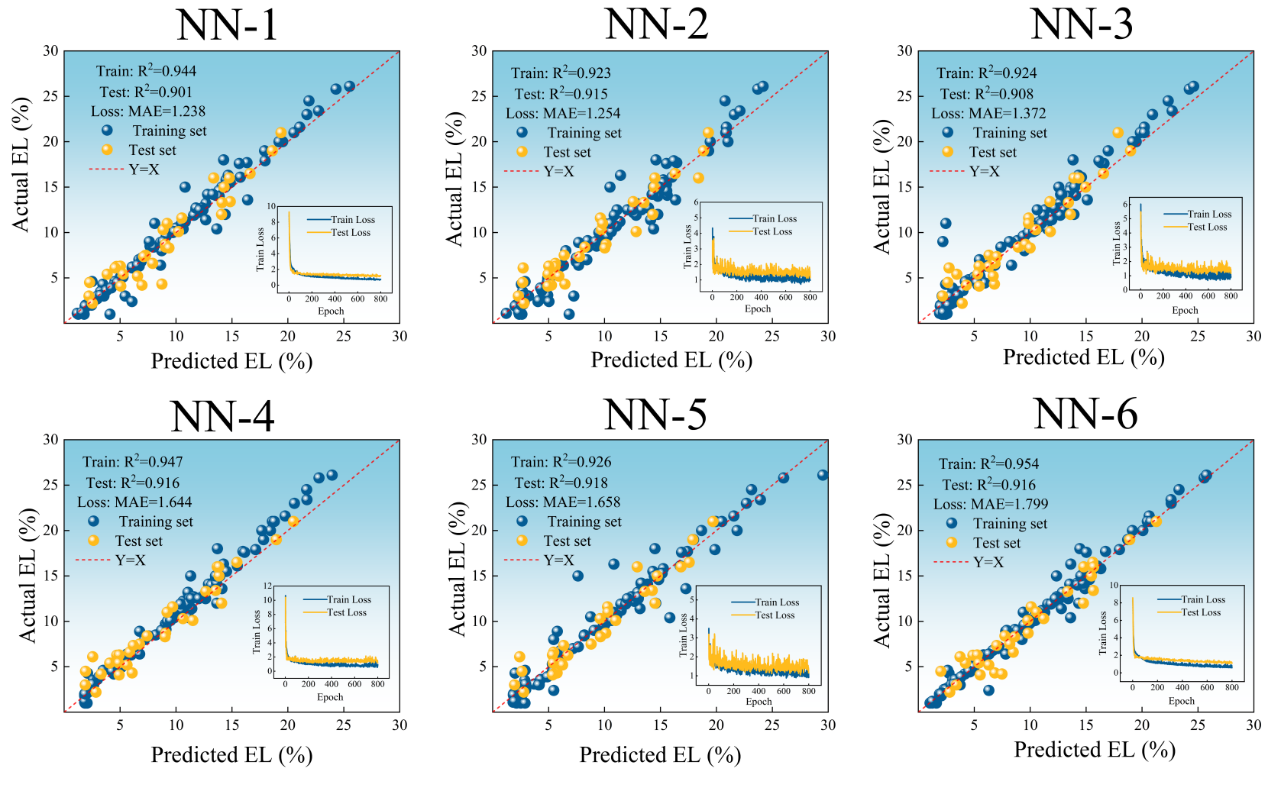


**Supplementary Fig. 5 | Training and testing performance of the top six NN-EL models in the first iteration.** NN-1 to NN-6 denote neural-network models constructed using the first- to sixth-ranked hyperparameter sets identified by Bayesian optimization, respectively. In each panel, the predicted EL values are plotted against the experimentally measured EL values for the training and test sets. The inset shows the evolution of the training and test loss curves during model training.


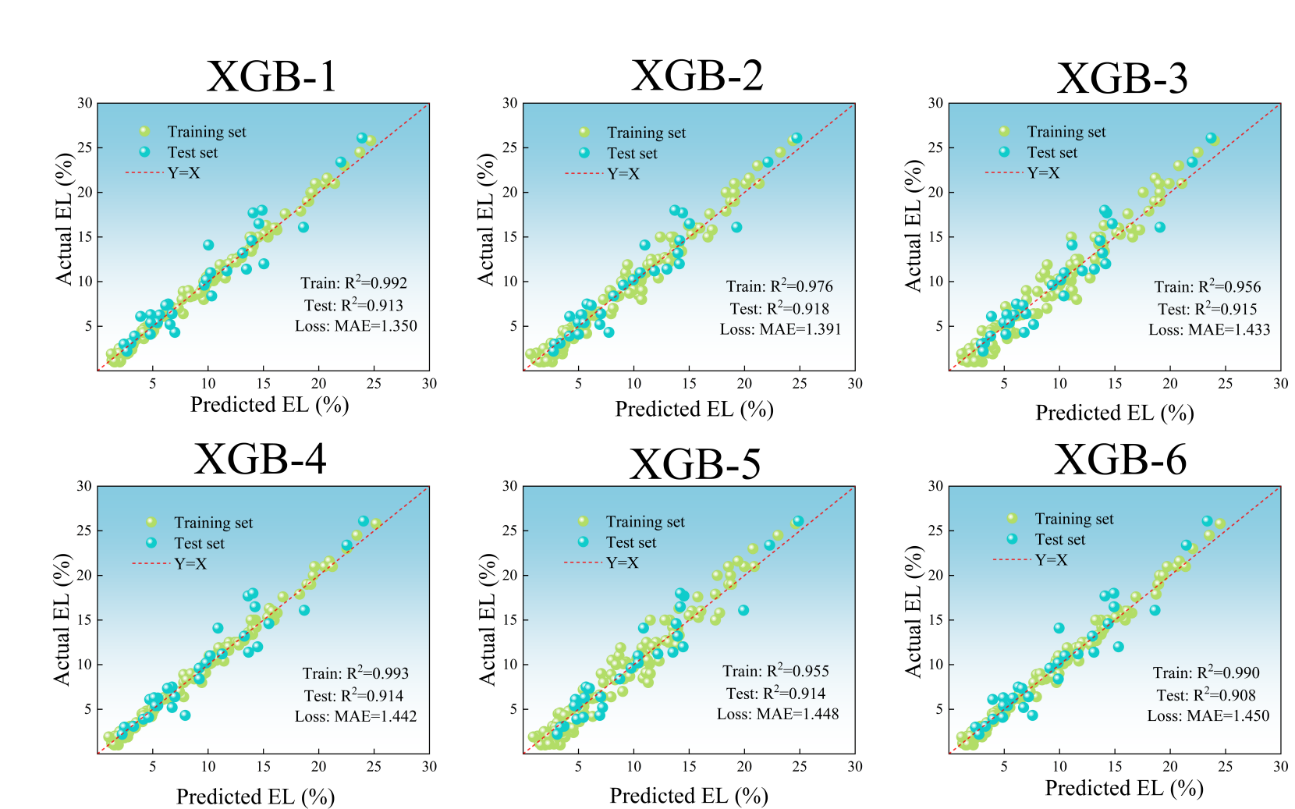


**Supplementary Fig. 6 | Training and testing performance of the top six XGBoost-EL models in the first iteration.** XGB-1 to XGB-6 denote XGBoost models constructed using the first- to sixth-ranked hyperparameter sets identified by Bayesian optimization, respectively. In each panel, the predicted EL values are plotted against the experimentally measured EL values for the training and test sets.


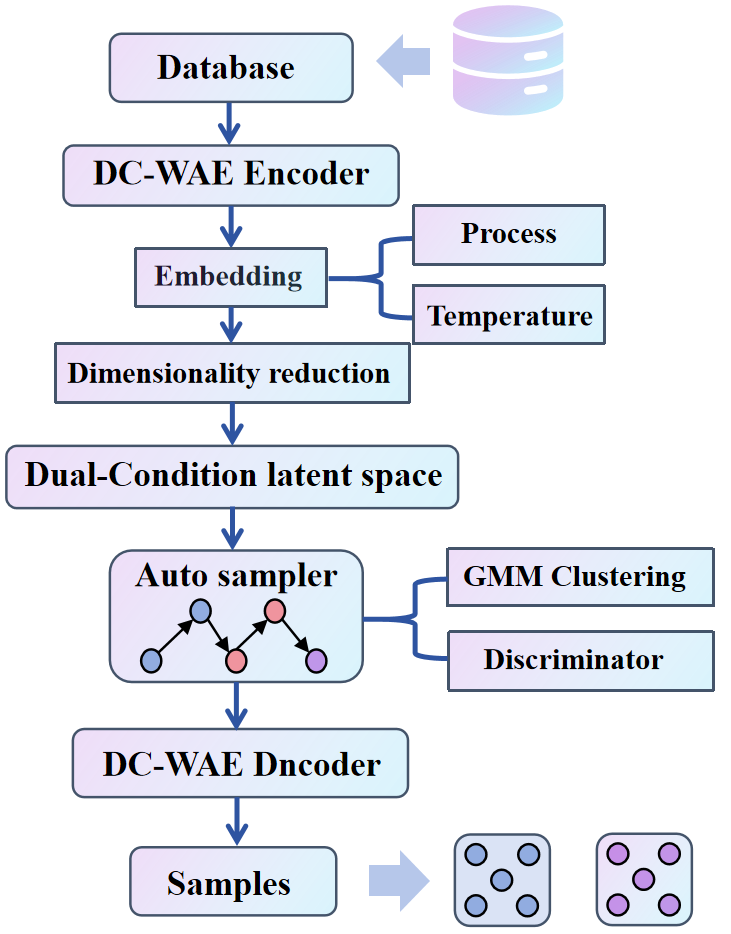


**Supplementary Fig. 7 | Schematic illustration of the DC-WAE-based dual-condition sampling workflow.** The alloy database is first encoded by the DC-WAE encoder with dual conditioning on processing route and testing temperature. The encoded records are mapped into a two-dimensional dual-condition latent space. An auto-sampler, assisted by Gaussian mixture model (GMM)-based density estimation and a neural-network discriminator, then performs guided sampling to identify promising latent points. These latent points are subsequently decoded by the DC-WAE decoder to reconstruct candidate alloy compositions for downstream surrogate prediction and experimental screening.


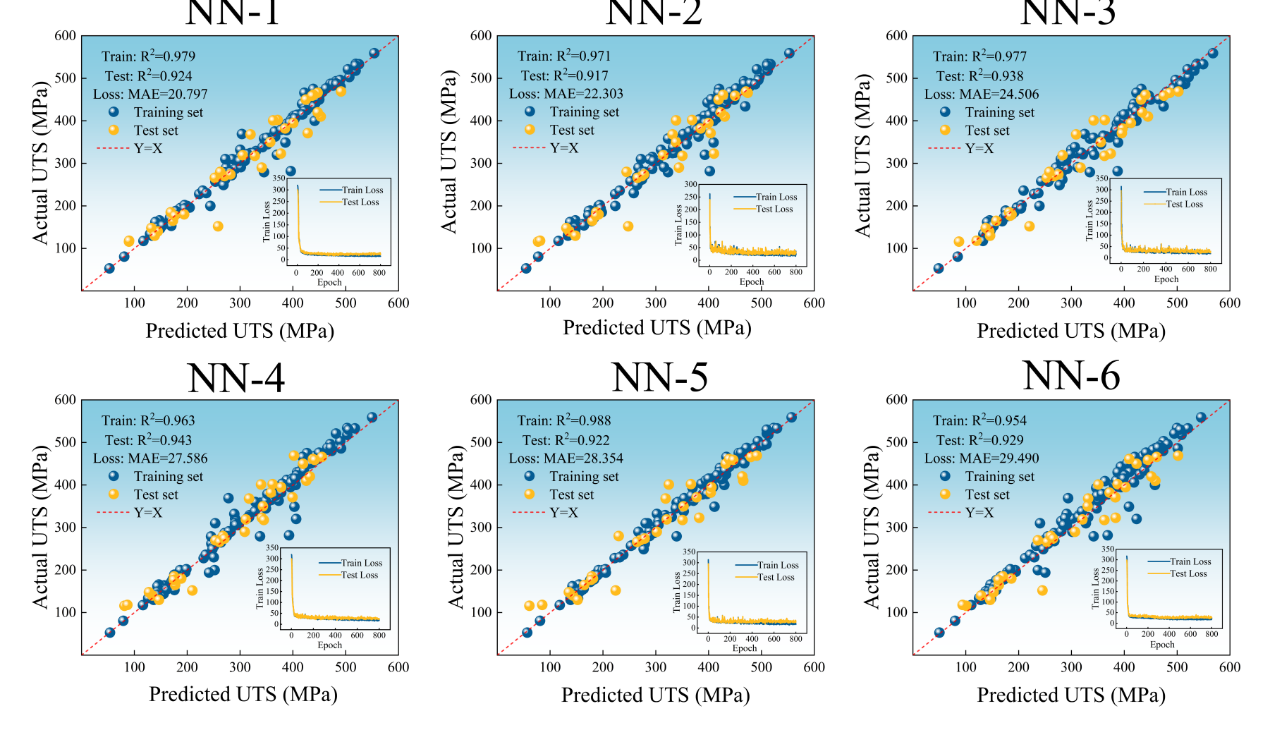


**Supplementary Fig. 8 | Training and testing performance of the top six NN-UTS models in the second iteration.** NN-1 to NN-6 denote neural-network models constructed using the first- to sixth-ranked hyperparameter sets identified by Bayesian optimization after first-round experimental feedback, respectively. In each panel, the predicted UTS values are plotted against the experimentally measured UTS values for the training and test sets. The inset shows the evolution of the training and test loss curves during model training.


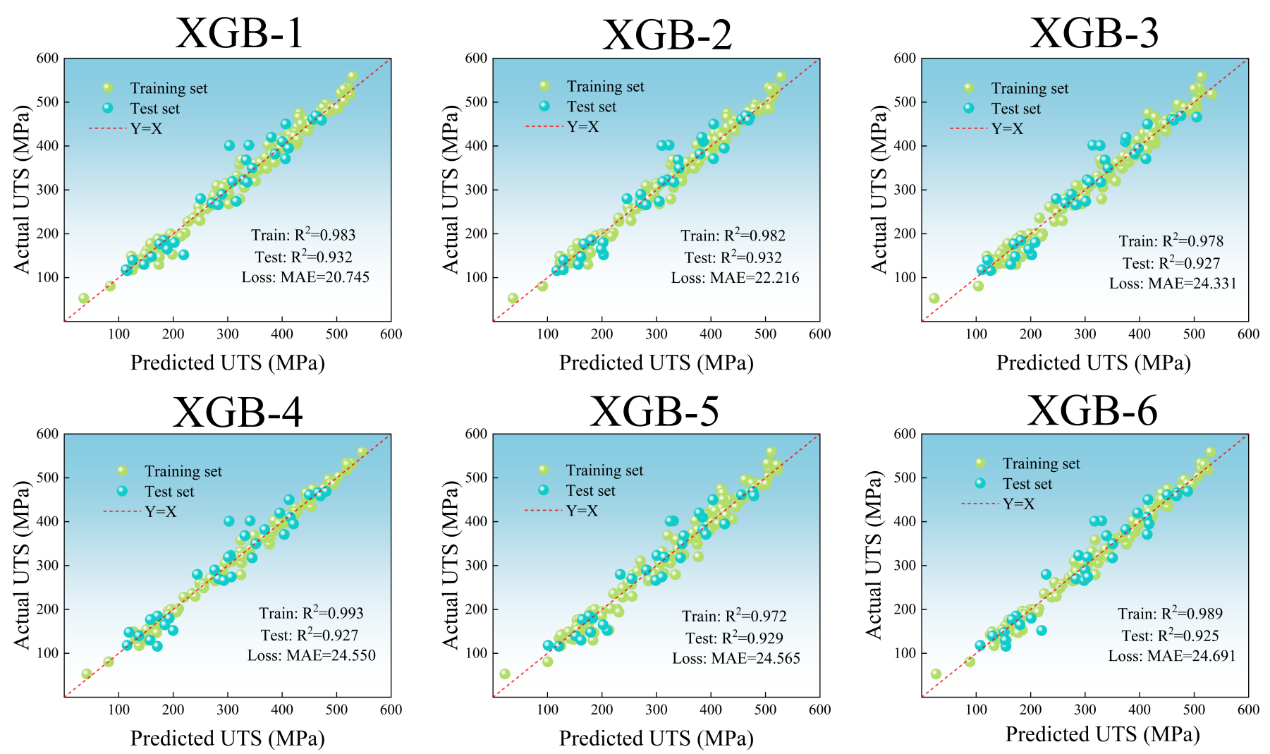


**Supplementary Fig. 9 | Training and testing performance of the top six XGBoost-UTS models in the second iteration.** XGB-1 to XGB-6 denote XGBoost models constructed using the first- to sixth-ranked hyperparameter sets identified by Bayesian optimization after first-round experimental feedback, respectively. In each panel, the predicted UTS values are plotted against the experimentally measured UTS values for the training and test sets.


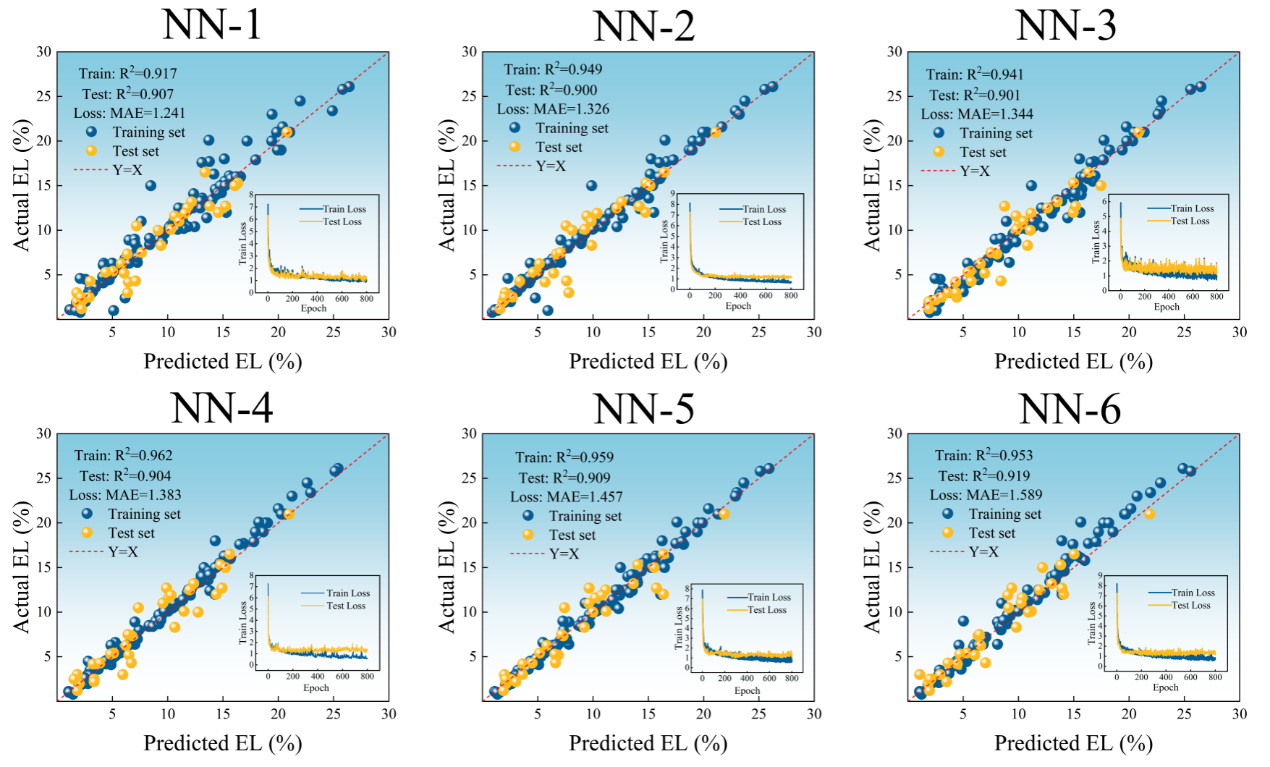


**Supplementary Fig. 10 | Training and testing performance of the top six NN-EL models in the second iteration.** NN-1 to NN-6 denote neural-network models constructed using the first- to sixth-ranked hyperparameter sets identified by Bayesian optimization after first-round experimental feedback, respectively. In each panel, the predicted EL values are plotted against the experimentally measured EL values for the training and test sets. The inset shows the evolution of the training and test loss curves during model training.


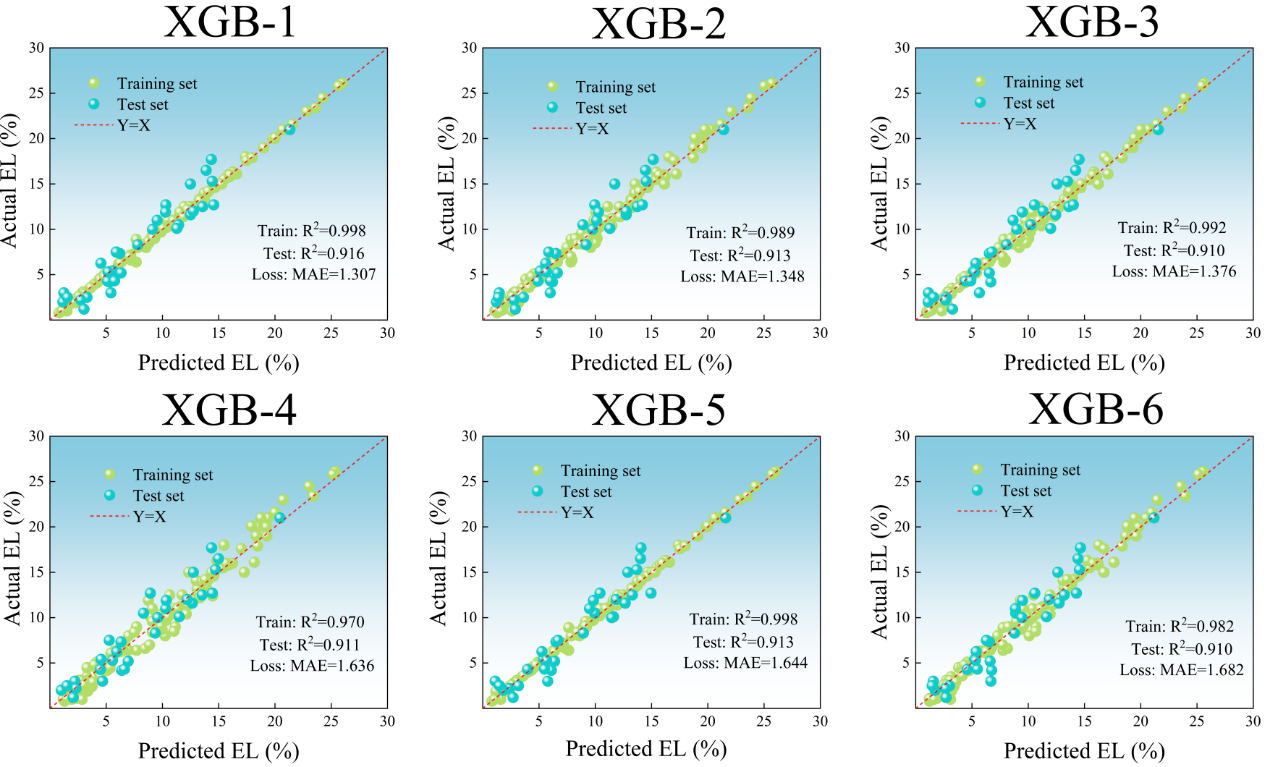


**Supplementary Fig. 11 | Training and testing performance of the top six XGBoost-EL models in the second iteration.** XGB-1 to XGB-6 denote XGBoost models constructed using the first- to sixth-ranked hyperparameter sets identified by Bayesian optimization after first-round experimental feedback, respectively. In each panel, the predicted EL values are plotted against the experimentally measured EL values for the training and test sets.


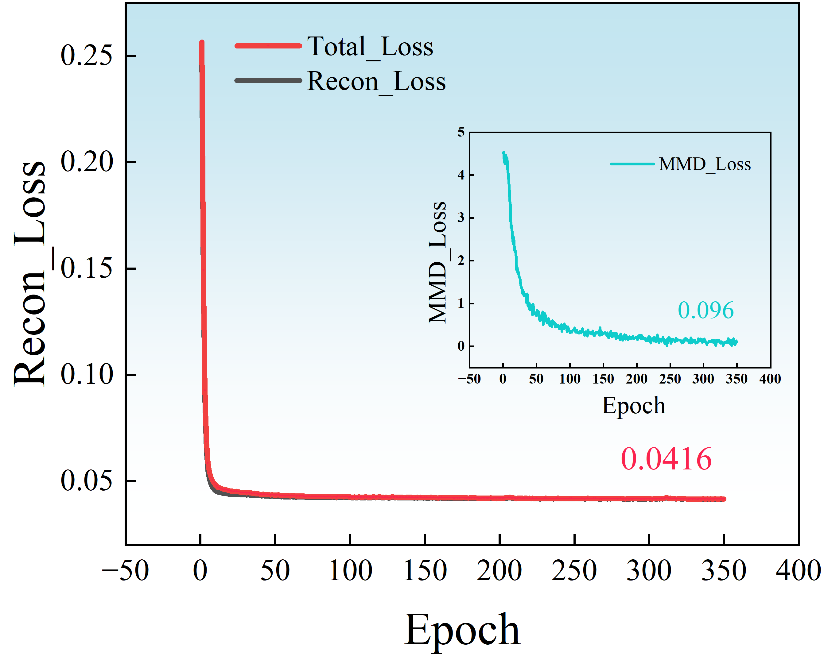


**Supplementary Fig. 12 | Training loss evolution of the DC-WAE model.** The main panel shows the total loss and reconstruction loss during training, while the inset shows the corresponding maximum mean discrepancy (MMD) loss. The rapid early-stage decrease and subsequent convergence of the loss terms indicate stable optimization and effective learning of a smooth, sampleable latent space.


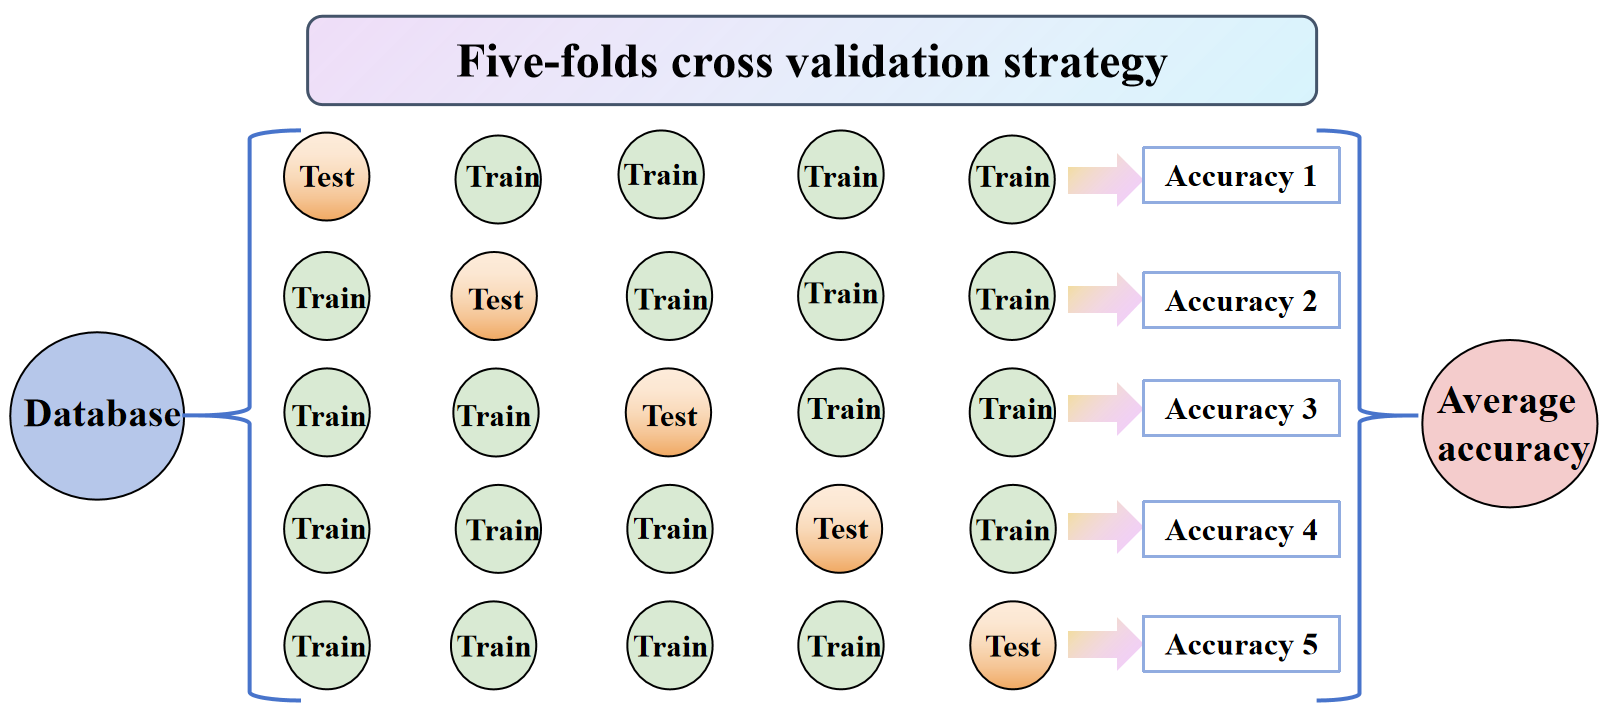


**Supplementary Fig. 13 | Schematic diagram of the five-fold cross-validation strategy used for discriminator evaluation.** The dataset was partitioned into five subsets. In each fold, one subset was used for testing and the remaining four subsets were used for training. This process was repeated five times, and the average accuracy across the five folds was used as the final discriminator-performance metric.

**
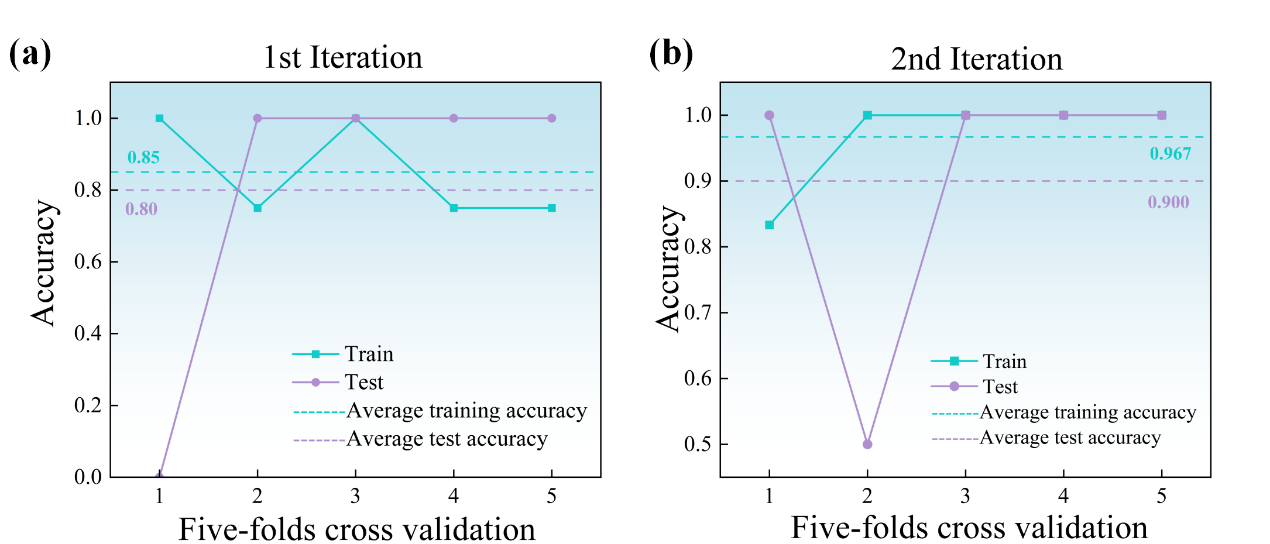
**

**Supplementary Fig. 14 | Five-fold cross-validation accuracy of the discriminator models in the first and second iterations.** **(a)** Cross-validation accuracy of the discriminator in the first iteration. **(b)** Cross-validation accuracy of the discriminator in the second iteration. The square and circular markers represent the training and test accuracies, respectively, and the dashed lines denote their corresponding average values. The higher test accuracy in the second iteration indicates improved discriminator performance after experimental feedback.


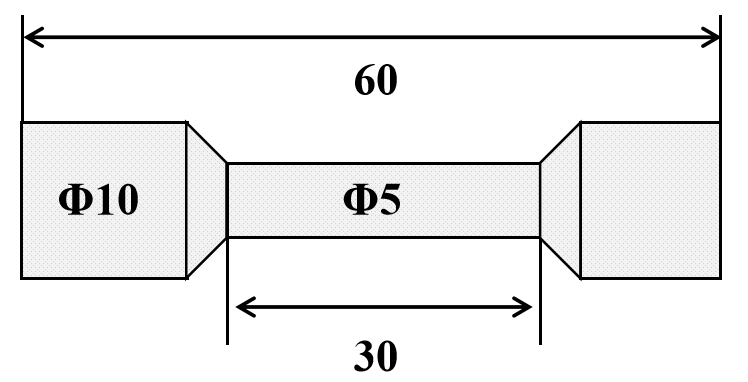


**Supplementary Fig. 15 | High-temperature tensile specimen geometry for testing at 300 °C.** The specimen had a total length of 60 mm, a gauge length of 30 mm, a gauge diameter of Φ5 mm and an end diameter of Φ10 mm. The same specimen geometry was used for all high-temperature tensile tests to ensure consistent and comparable mechanical-property measurements.

**Supplementary tables**

**Supplementary Table 1. | Top six Bayesian-optimized hyperparameter sets for the NN-UTS ensemble in the first iteration.** The hyperparameter sets are ranked by MAE, with Rank 1 corresponding to the lowest MAE.

| Rank | MAE | Batch size | Learning rate | Hidden size | Depth |
| --- | --- | --- | --- | --- | --- |
| 1 | 23.512321 | 38.733556 | 0.014344 | 41.754749 | 5.269299 |
| 2 | 24.867170 | 42.277360 | 0.012377 | 60.849892 | 6.090922 |
| 3 | 26.309128 | 37.223506 | 0.000915 | 39.746673 | 6.645402 |
| 4 | 27.453638 | 31.724669 | 0.006494 | 60.510465 | 7.350638 |
| 5 | 27.823027 | 42.277360 | 0.012392 | 60.849892 | 6.090922 |
| 6 | 28.249420 | 31.724669 | 0.001469 | 60.510465 | 7.350638 |

**Supplementary Table 2. | Top six Bayesian-optimized hyperparameter sets for the XGBoost-UTS ensemble in the first iteration.** The hyperparameter sets are ranked by MAE, with Rank 1 corresponding to the lowest MAE.

| Rank | MAE | Learning rate | Subsample ratio | Trees | … |
| --- | --- | --- | --- | --- | --- |
| 1 | 27.989706 | 0.078671 | 0.459503 | 785.294408 | … |
| 2 | 28.044889 | 0.050341 | 0.271410 | 866.186192 | … |
| 3 | 28.157249 | 0.041729 | 0.331633 | 777.739797 | … |
| 4 | 28.335594 | 0.034162 | 0.477072 | 742.132659 | … |
| 5 | 28.481562 | 0.096288 | 0.324551 | 482.714938 | … |
| 6 | 28.769247 | 0.059426 | 0.460776 | 461.555382 | … |

Note: For brevity, only learning rate, subsample ratio and number of trees are shown. The complete XGBoost hyperparameter set additionally included maximum depth, minimum child weight, column-sampling ratio, L1 regularization, L2 regularization and minimum split loss.

**Supplementary Table 3. | Top six Bayesian-optimized hyperparameter sets for the NN-EL ensemble in the first iteration.** The hyperparameter sets are ranked by MAE, with Rank 1 corresponding to the lowest MAE.

| Rank | MAE | Batch size | Learning rate | Hidden size | Depth |
| --- | --- | --- | --- | --- | --- |
| 1 | 1.237709 | 49.731057 | 0.002652 | 50.239929 | 2.149155 |
| 2 | 1.254177 | 37.223506 | 0.008010 | 39.746673 | 7.419636 |
| 3 | 1.372041 | 37.223506 | 0.004620 | 39.746673 | 8.193870 |
| 4 | 1.644185 | 62.802627 | 0.008092 | 63.377523 | 7.463704 |
| 5 | 1.658090 | 38.733556 | 0.010762 | 80.331605 | 5.269299 |
| 6 | 1.799433 | 33.020818 | 0.001481 | 43.803235 | 3.233889 |

**Supplementary Table 4. | Top six Bayesian-optimized hyperparameter sets for the XGBoost-EL ensemble in the first iteration.** The hyperparameter sets are ranked by MAE, with Rank 1 corresponding to the lowest MAE.

| Rank | MAE | Learning rate | Subsample ratio | Trees | … |
| --- | --- | --- | --- | --- | --- |
| 1 | 1.350109 | 0.029806 | 0.789078 | 251.455604 | … |
| 2 | 1.390657 | 0.029692 | 0.644289 | 434.091755 | … |
| 3 | 1.432941 | 0.040961 | 0.646843 | 263.405206 | … |
| 4 | 1.442415 | 0.047525 | 0.600060 | 229.775338 | … |
| 5 | 1.448305 | 0.027708 | 0.563504 | 423.919905 | … |
| 6 | 1.450059 | 0.030535 | 0.778198 | 330.029174 | … |

Note: For brevity, only learning rate, subsample ratio and number of trees are shown. The complete XGBoost hyperparameter set additionally included maximum depth, minimum child weight, column-sampling ratio, L1 regularization, L2 regularization and minimum split loss.

**Supplementary Table 5. | Top six Bayesian-optimized hyperparameter sets for the NN-UTS ensemble in the second iteration.** The hyperparameter sets are ranked by MAE after first-round experimental feedback, with Rank 1 corresponding to the lowest MAE.

| Rank | MAE | Batch size | Learning rate | Hidden size | Depth |
| --- | --- | --- | --- | --- | --- |
| 1 | 20.796780 | 33.020818 | 0.002117 | 43.803235 | 3.057619 |
| 2 | 22.302652 | 14.623368 | 0.009664 | 16.027784 | 7.668014 |
| 3 | 24.506199 | 41.393979 | 0.008067 | 45.376771 | 5.074546 |
| 4 | 27.586191 | 37.223506 | 0.004240 | 22.815114 | 6.645402 |
| 5 | 28.354332 | 38.733556 | 0.007155 | 41.754749 | 5.269299 |
| 6 | 29.490215 | 33.404640 | 0.009069 | 30.171739 | 2.036467 |

**Supplementary Table 6. | Top six Bayesian-optimized hyperparameter sets for the XGBoost-UTS ensemble in the second iteration.** The hyperparameter sets are ranked by MAE after first-round experimental feedback, with Rank 1 corresponding to the lowest MAE.

| Rank | MAE | Learning rate | Subsample ratio | Trees | … |
| --- | --- | --- | --- | --- | --- |
| 1 | 20.744736 | 0.063661 | 0.292503 | 731.389153 | … |
| 2 | 22.215511 | 0.050341 | 0.271410 | 866.186192 | … |
| 3 | 24.330807 | 0.064855 | 0.222176 | 620.216820 | … |
| 4 | 24.549534 | 0.062154 | 0.391020 | 595.497356 | … |
| 5 | 24.564671 | 0.047253 | 0.352998 | 465.744502 | … |
| 6 | 24.690800 | 0.044393 | 0.385291 | 461.588829 | … |

Note: For brevity, only learning rate, subsample ratio and number of trees are shown. The complete XGBoost hyperparameter set additionally included maximum depth, minimum child weight, column-sampling ratio, L1 regularization, L2 regularization and minimum split loss.

**Supplementary Table 7. | Top six Bayesian-optimized hyperparameter sets for the NN-EL ensemble in the second iteration.** The hyperparameter sets are ranked by MAE after first-round experimental feedback, with Rank 1 corresponding to the lowest MAE.

| Rank | MAE | Batch size | Learning rate | Hidden size | Depth |
| --- | --- | --- | --- | --- | --- |
| 1 | 1.241110 | 61.616039 | 0.002567 | 84.721218 | 3.057619 |
| 2 | 1.325853 | 33.020818 | 0.001001 | 84.721218 | 3.057619 |
| 3 | 1.343781 | 22.192931 | 0.006840 | 25.202394 | 7.668014 |
| 4 | 1.383115 | 73.857620 | 0.007120 | 80.331605 | 5.269299 |
| 5 | 1.457012 | 71.124741 | 0.005569 | 37.815503 | 6.798401 |
| 6 | 1.588623 | 70.621799 | 0.004668 | 39.746673 | 6.645402 |

**Supplementary Table 8. | Top six Bayesian-optimized hyperparameter sets for the XGBoost-EL ensemble in the second iteration.** The hyperparameter sets are ranked by MAE after first-round experimental feedback, with Rank 1 corresponding to the lowest MAE.

| Rank | MAE | Learning rate | Subsample ratio | Trees | … |
| --- | --- | --- | --- | --- | --- |
| 1 | 1.306976 | 0.070833 | 0.566500 | 850.948569 | … |
| 2 | 1.347598 | 0.020281 | 0.617160 | 848.610645 | … |
| 3 | 1.376005 | 0.058512 | 0.649087 | 846.663627 | … |
| 4 | 1.636338 | 0.068780 | 0.628165 | 259.537080 | … |
| 5 | 1.644278 | 0.078382 | 0.774026 | 844.393084 | … |
| 6 | 1.681973 | 0.055775 | 0.681640 | 474.768987 | … |

For brevity, only learning rate, subsample ratio and number of trees are shown. The complete XGBoost hyperparameter set additionally included maximum depth, minimum child weight, column-sampling ratio, L1 regularization, L2 regularization and minimum split loss.

| Sample No. | Types | Alloy composition (wt.%) | | | | | | | | | | | | | Error  (%) |
| --- | --- | --- | --- | --- | --- | --- | --- | --- | --- | --- | --- | --- | --- | --- | --- |
| Al | Cu | Mn | Mg | Ti | Ag | Sc | Fe | Si | Zr | V | Li | Zn |
| A1 | Pre. | 93.9 | 5.2 | 0.4 | 0.1 | 0.1 | 0.1 | 0 | 0.1 | 0 | 0.1 | 0 | 0 | 0 | 0.027 |
| Exp. | 93.791 | 5.26 | 0.428 | 0.101 | 0.106 | 0.102 | 0 | 0.104 | 0 | 0.108 | 0 | 0 | 0 |
| A2 | Pre. | 93.5 | 5.6 | 0.5 | 0.1 | 0.1 | 0.1 | 0 | 0 | 0 | 0.1 | 0 | 0 | 0 | 0.022 |
| Exp. | 93.425 | 5.64 | 0.522 | 0.102 | 0.098 | 0.104 | 0 | 0 | 0 | 0.109 | 0 | 0 | 0 |
| A3 | Pre. | 95.2 | 4.1 | 0.4 | 0.1 | 0.1 | 0 | 0 | 0.1 | 0 | 0 | 0 | 0 | 0 | 0.02 |
| Exp. | 95.183 | 4.14 | 0.36 | 0.096 | 0.116 | 0 | 0 | 0.105 | 0 | 0 | 0 | 0 | 0 |
| B1 | Pre. | 92.8 | 6.5 | 0.6 | 0.1 | 0 | 0 | 0 | 0 | 0 | 0 | 0 | 0 | 0 | 0.032 |
| Exp. | 92.736 | 6.52 | 0.642 | 0.102 | 0 | 0 | 0 | 0 | 0 | 0 | 0 | 0 | 0 |
| B2 | Pre. | 92 | 7.1 | 0.7 | 0.1 | 0 | 0 | 0 | 0.1 | 0 | 0 | 0 | 0 | 0 | 0.035 |
| Exp. | 91.913 | 7.15 | 0.73 | 0.099 | 0 | 0 | 0 | 0.108 | 0 | 0 | 0 | 0 | 0 |
| B3 | Pre. | 91.4 | 7.7 | 0.7 | 0.1 | 0 | 0 | 0 | 0.1 | 0 | 0 | 0 | 0 | 0 | 0.092 |
| Exp. | 91.172 | 7.91 | 0.715 | 0.098 | 0 | 0 | 0 | 0.105 | 0 | 0 | 0 | 0 | 0 |

**Supplementary Table 9. | Designed and experimentally measured compositions of the closed-loop Al-Cu alloy candidates. Compositions are given in wt.%.** “Pre.” denotes the designed composition generated by the closed-loop framework, and “Exp.” denotes the experimentally measured composition. The error column reports the overall relative deviation between the designed and measured compositions.

**Supplementary Table 10. | Compiled Al-Cu alloy dataset used for cross-condition learning.** Alloy compositions are given in wt.%. T, UTS and EL denote testing temperature, ultimate tensile strength and elongation, respectively. The Ref. column corresponds to the dataset references listed below the table. Rows are shaded according to processing route: gray, GC; green, GC+T6; yellow, GC+T7; red, GC+HE+T6; and blue, GC+HR+T6.

| **Alloy composition (wt.%)** | | | | | | | | | | | | | | | | | | | | | | | | | **T**  **(℃)** | | **UTS**  **(MPa)** | | | **EL**  **(%)** | **Ref** | |
| --- | --- | --- | --- | --- | --- | --- | --- | --- | --- | --- | --- | --- | --- | --- | --- | --- | --- | --- | --- | --- | --- | --- | --- | --- | --- | --- | --- | --- | --- | --- | --- | --- |
| **Al** | | **Cu** | **Mn** | | | **Mg** | **Ti** | | | **Ag** | **Sc** | | | **Fe** | **Si** | | | **Zr** | **V** | | | **Li** | **Zn** | |
| 93.4 | 5.75 | | | 0.3 | 0.42 | | | 0 | 0 | | | 0 | 0 | | | 0 | 0.13 | | | 0 | 0 | | | 0 | | 25 | | 230 | 4.2 | | | 1 |
| 93.31 | 5.81 | | | 0.27 | 0.39 | | | 0 | 0 | | | 0.11 | 0 | | | 0 | 0.11 | | | 0 | 0 | | | 0 | | 25 | | 257 | 4.6 | | |
| 93.25 | 5.80 | | | 0.29 | 0.32 | | | 0 | 0 | | | 0.2 | 0 | | | 0 | 0.14 | | | 0 | 0 | | | 0 | | 25 | | 310 | 6.3 | | |
| 93.16 | 5.83 | | | 0.26 | 0.33 | | | 0 | 0 | | | 0.29 | 0 | | | 0 | 0.13 | | | 0 | 0 | | | 0 | | 25 | | 270 | 5.3 | | |
| 93.13 | 5.78 | | | 0.27 | 0.30 | | | 0 | 0 | | | 0.4 | 0 | | | 0 | 0.12 | | | 0 | 0 | | | 0 | | 25 | | 249 | 4.1 | | |
| 94.35 | 4.54 | | | 0.92 | 0 | | | 0 | 0 | | | 0 | 0.13 | | | 0 | 0 | | | 0 | 0 | | | 0 | | 25 | | 147 | 4.5 | | | 2 |
| 93.33 | 4.95 | | | 0.49 | 0.28 | | | 0.16 | 0 | | | 0 | 0.18 | | | 0 | 0 | | | 0 | 0.61 | | | 0 | | 25 | | 236 | 5 | | | 3 |
| 93.51 | 5.87 | | | 0.36 | 0.02 | | | 0 | 0 | | | 0 | 0.03 | | | 0 | 0.14 | | | 0.07 | 0 | | | 0 | | 25 | | 165 | 7.34 | | | 4 |
| 93.42 | 5.90 | | | 0.36 | 0.02 | | | 0 | 0 | | | 0 | 0.10 | | | 0 | 0.14 | | | 0.07 | 0 | | | 0 | | 25 | | 157 | 6.79 | | |
| 93.42 | 5.89 | | | 0.36 | 0.02 | | | 0 | 0 | | | 0 | 0.15 | | | 0 | 0.04 | | | 0.13 | 0 | | | 0 | | 25 | | 140 | 5.41 | | |
| 93.35 | 5.88 | | | 0.36 | 0.02 | | | 0 | 0 | | | 0 | 0.20 | | | 0 | 0.06 | | | 0.14 | 0 | | | 0 | | 25 | | 134 | 4.98 | | |
| 95.65 | 3.50 | | | 0.35 | 0.25 | | | 0 | 0 | | | 0 | 0.15 | | | 0 | 0 | | | 0 | 0 | | | 0.10 | | 25 | | 154 | 6.3 | | | 5 |
| 94.65 | 4.50 | | | 0.35 | 0.25 | | | 0 | 0 | | | 0 | 0.15 | | | 0 | 0 | | | 0 | 0 | | | 0.10 | | 25 | | 189 | 6.1 | | |
| 93.65 | 5.50 | | | 0.35 | 0.25 | | | 0 | 0 | | | 0 | 0.15 | | | 0 | 0 | | | 0 | 0 | | | 0.10 | | 25 | | 196 | 5.1 | | |
| 93.15 | 4.50 | | | 0.35 | 0.25 | | | 0 | 0 | | | 0 | 0.15 | | | 1.50 | 0 | | | 0 | 0 | | | 0.10 | | 25 | | 188 | 4.8 | | |
| 91.65 | 4.50 | | | 0.35 | 0.25 | | | 0 | 0 | | | 0 | 0.15 | | | 3.00 | 0 | | | 0 | 0 | | | 0.10 | | 25 | | 178 | 2.4 | | |
| 91.60 | 6.85 | | | 0.20 | 0.01 | | | 0.06 | 0 | | | 0 | 0.60 | | | 0 | 0 | | | 0 | 0 | | | 0.68 | | 25 | | 132 | 1.8 | | | 6 |
| 92.08 | 6.37 | | | 0.18 | 0.01 | | | 0.06 | 0.07 | | | 0 | 0.57 | | | 0 | 0 | | | 0 | 0 | | | 0.66 | | 25 | | 130 | 1.9 | | |
| 91.51 | 6.84 | | | 0.18 | 0.01 | | | 0.02 | 0.10 | | | 0 | 0.61 | | | 0 | 0 | | | 0 | 0 | | | 0.73 | | 25 | | 148 | 1.9 | | |
| 91.53 | 6.78 | | | 0.19 | 0.01 | | | 0.08 | 0.03 | | | 0 | 0.62 | | | 0 | 0 | | | 0 | 0 | | | 0.76 | | 25 | | 162 | 2 | | |
| 94.90 | 4.56 | | | 0.32 | 0 | | | 0.12 | 0 | | | 0 | 0.03 | | | 0.07 | 0 | | | 0 | 0 | | | 0 | | 25 | | 317.6 | 4.32 | | | 7 |
| 94.78 | 4.63 | | | 0 | 0.29 | | | 0.25 | 0 | | | 0 | 0.02 | | | 0.03 | 0 | | | 0 | 0 | | | 0 | | 25 | | 393.1 | 4.44 | | |
| 94.12 | 4.36 | | | 0.32 | 0.26 | | | 0.27 | 0.60 | | | 0 | 0.03 | | | 0.05 | 0 | | | 0 | 0 | | | 0 | | 25 | | 449.9 | 3.6 | | |
| 94.31 | 4.71 | | | 0.32 | 0.29 | | | 0.25 | 0 | | | 0.04 | 0.04 | | | 0.04 | 0 | | | 0 | 0 | | | 0 | | 25 | | 410.6 | 6.31 | | |
| 94.89 | 4.97 | | | 0 | 0 | | | 0.14 | 0 | | | 0 | 0 | | | 0 | 0 | | | 0 | 0 | | | 0 | | 25 | | 358.3 | 6.4 | | | 8 |
| 94.15 | 5.09 | | | 0 | 0 | | | 0.76 | 0 | | | 0 | 0 | | | 0 | 0 | | | 0 | 0 | | | 0 | | 25 | | 368.1 | 5.2 | | |
| 94.89 | 4.97 | | | 0 | 0 | | | 0.14 | 0 | | | 0 | 0 | | | 0 | 0 | | | 0 | 0 | | | 0 | | 25 | | 279.3 | 8.9 | | |
| 94.15 | 5.09 | | | 0 | 0 | | | 0.76 | 0 | | | 0 | 0 | | | 0 | 0 | | | 0 | 0 | | | 0 | | 25 | | 324.2 | 6.4 | | |
| 96.77 | 2.04 | | | 1.00 | 0 | | | 0 | 0 | | | 0 | 0.13 | | | 0.06 | 0 | | | 0 | 0 | | | 0 | | 25 | | 153 | 8.4 | | | 2 |
| 94.35 | 4.54 | | | 0.92 | 0 | | | 0 | 0 | | | 0 | 0.13 | | | 0.06 | 0 | | | 0 | 0 | | | 0 | | 25 | | 369 | 6.26 | | |
| 91.38 | 7.41 | | | 1.01 | 0 | | | 0 | 0 | | | 0 | 0.14 | | | 0.06 | 0 | | | 0 | 0 | | | 0 | | 25 | | 323 | 1.08 | | |
| 94.69 | 5.30 | | | 0 | 0 | | | 0 | 0 | | | 0 | 0.01 | | | 0 | 0 | | | 0 | 0 | | | 0 | | 25 | | 401 | 10.5 | | | 9 |
| 94.42 | 5.20 | | | 0.21 | 0 | | | 0 | 0 | | | 0 | 0.02 | | | 0 | 0.15 | | | 0 | 0 | | | 0 | | 25 | | 403 | 11.9 | | |
| 97.11 | 1.04 | | | 0 | 0.98 | | | 0 | 0 | | | 0 | 0.33 | | | 0.54 | 0 | | | 0 | 0 | | | 0 | | 25 | | 152 | 12.7 | | | 10 |
| 90.67 | 1.00 | | | 0 | 0.98 | | | 0 | 0 | | | 0 | 0.33 | | | 7.02 | 0 | | | 0 | 0 | | | 0 | | 25 | | 164 | 7.2 | | |
| 95.29 | 3.02 | | | 0 | 1.04 | | | 0 | 0 | | | 0 | 0.27 | | | 0.38 | 0 | | | 0 | 0 | | | 0 | | 25 | | 290 | 7.5 | | |
| 93.68 | 4.45 | | | 0 | 1.06 | | | 0 | 0 | | | 0 | 0.40 | | | 0.41 | 0 | | | 0 | 0 | | | 0 | | 25 | | 360 | 5.4 | | |
| 92.24 | 6.01 | | | 0 | 0.97 | | | 0 | 0 | | | 0 | 0.38 | | | 0.40 | 0 | | | 0 | 0 | | | 0 | | 25 | | 402 | 2.5 | | |
| 85.82 | 1.04 | | | 0 | 0.90 | | | 0 | 0 | | | 0 | 0.24 | | | 12.00 | 0 | | | 0 | 0 | | | 0 | | 25 | | 180 | 3 | | |
| 79.70 | 1.04 | | | 0 | 0.96 | | | 0 | 0 | | | 0 | 0.30 | | | 18.0 | 0 | | | 0 | 0 | | | 0 | | 25 | | 200 | 1.1 | | |
| 92.32 | 0 | | | 0 | 2.04 | | | 0 | 1.00 | | | 2.00 | 0.02 | | | 0.02 | 0.12 | | | 0 | 2.48 | | | 0 | | 25 | | 379 | 6.1 | | | 11 |
| 91.69 | 0.55 | | | 0 | 2.06 | | | 0 | 1.00 | | | 2.00 | 0.04 | | | 0.02 | 0.12 | | | 0 | 2.53 | | | 0 | | 25 | | 382 | 4.3 | | |
| 91.28 | 1.03 | | | 0 | 2.04 | | | 0 | 1.00 | | | 2.00 | 0.02 | | | 0 | 0.13 | | | 0 | 2.50 | | | 0 | | 25 | | 396 | 2 | | |
| 90.83 | 1.48 | | | 0 | 2.06 | | | 0 | 1.00 | | | 2.00 | 0.02 | | | 0.01 | 0.13 | | | 0 | 2.47 | | | 0 | | 25 | | 395 | 1.2 | | |
| 95.35 | 1.93 | | | 0 | 0.45 | | | 0 | 0 | | | 0 | 0.11 | | | 0 | 0.18 | | | 0 | 1.98 | | | 0 | | 25 | | 443 | 4.5 | | | 12 |
| 95.88 | 1.89 | | | 0 | 0 | | | 0 | 0 | | | 0 | 0.10 | | | 0 | 0.17 | | | 0 | 1.96 | | | 0 | | 25 | | 363 | 2 | | |
| 94.69 | 2.09 | | | 0 | 0.91 | | | 0 | 0 | | | 0 | 0.13 | | | 0 | 0.15 | | | 0 | 2.03 | | | 0 | | 25 | | 431 | 2.1 | | |
| 94.74 | 1.90 | | | 0 | 1.39 | | | 0 | 0 | | | 0 | 0.12 | | | 0 | 0.15 | | | 0 | 1.70 | | | 0 | | 25 | | 415 | 2.6 | | |
| 94.88 | 2.02 | | | 0 | 0 | | | 0 | 0 | | | 0 | 0 | | | 0 | 0.15 | | | 0 | 2.95 | | | 0 | | 25 | | 415 | 2.7 | | | 13 |
| 94.41 | 2.13 | | | 0.30 | 0 | | | 0 | 0 | | | 0 | 0 | | | 0 | 0.15 | | | 0 | 3.01 | | | 0 | | 25 | | 395 | 3.5 | | |
| 94.01 | 2.14 | | | 0.51 | 0 | | | 0 | 0 | | | 0 | 0 | | | 0 | 0.14 | | | 0 | 3.20 | | | 0 | | 25 | | 382 | 3.1 | | |
| 94.08 | 2.06 | | | 0.78 | 0 | | | 0 | 0 | | | 0 | 0 | | | 0 | 0.16 | | | 0 | 2.92 | | | 0 | | 25 | | 365 | 3 | | |
| 94.53 | 0.99 | | | 1.17 | 0 | | | 0 | 0 | | | 0 | 0 | | | 0 | 0.16 | | | 0 | 3.15 | | | 0 | | 25 | | 338 | 2.9 | | |
| 95.36 | 1.55 | | | 0 | 0.47 | | | 0 | 0 | | | 0 | 0 | | | 0 | 0.14 | | | 0 | 2.48 | | | 0 | | 25 | | 451 | 2.6 | | | 14 |
| 93.90 | 1.57 | | | 0 | 0.45 | | | 0 | 0 | | | 0 | 0 | | | 0 | 0.15 | | | 0 | 2.47 | | | 1.46 | | 25 | | 406 | 1 | | |
| 94.74 | 1.58 | | | 0 | 0.54 | | | 0 | 0 | | | 0 | 0 | | | 0 | 0.13 | | | 0 | 2.46 | | | 0.55 | | 25 | | 461 | 2.2 | | |
| 94.51 | 1.44 | | | 0 | 0.45 | | | 0 | 0 | | | 0 | 0 | | | 0 | 0.16 | | | 0 | 2.45 | | | 0.99 | | 25 | | 459 | 4.6 | | |
| 95.57 | 2.11 | | | 0 | 0.51 | | | 0 | 0 | | | 0 | 0 | | | 0 | 0 | | | 0 | 1.81 | | | 0 | | 25 | | 378 | 2.3 | | | 15 |
| 95.55 | 1.97 | | | 0 | 0.48 | | | 0.05 | 0 | | | 0 | 0 | | | 0 | 0 | | | 0 | 1.95 | | | 0 | | 25 | | 412 | 2.7 | | |
| 95.38 | 2.08 | | | 0 | 0.52 | | | 0.10 | 0 | | | 0 | 0 | | | 0 | 0 | | | 0 | 1.92 | | | 0 | | 25 | | 415 | 2.8 | | |
| 95.47 | 2.20 | | | 0 | 0.49 | | | 0.02 | 0 | | | 0 | 0 | | | 0 | 0 | | | 0 | 1.82 | | | 0 | | 25 | | 402 | 2.5 | | |
| 95.26 | 2.09 | | | 0 | 0.51 | | | 0.16 | 0 | | | 0 | 0 | | | 0 | 0 | | | 0 | 1.98 | | | 0 | | 25 | | 423 | 3 | | |
| 95.43 | 1.94 | | | 0 | 0.47 | | | 0.31 | 0 | | | 0 | 0 | | | 0 | 0 | | | 0 | 1.85 | | | 0 | | 25 | | 414 | 3.1 | | |
| 98.92 | 1.08 | | | 0 | 0 | | | 0 | 0 | | | 0 | 0 | | | 0 | 0 | | | 0 | 0 | | | 0 | | 25 | | 194 | 21 | | | 16 |
| 98.74 | 1.08 | | | 0 | 0 | | | 0 | 0 | | | 0.18 | 0 | | | 0 | 0 | | | 0 | 0 | | | 0 | | 25 | | 262 | 8 | | |
| 98.69 | 1.08 | | | 0 | 0 | | | 0 | 0 | | | 0.18 | 0 | | | 0.05 | 0 | | | 0 | 0 | | | 0 | | 25 | | 279 | 20 | | |
| 98.69 | 1.08 | | | 0 | 0 | | | 0 | 0 | | | 0.18 | 0 | | | 0 | 0.05 | | | 0 | 0 | | | 0 | | 25 | | 287 | 21 | | |
| 95.65 | 3.50 | | | 0.35 | 0.25 | | | 0 | 0 | | | 0 | 0.15 | | | 0 | 0 | | | 0 | 0 | | | 0.10 | | 25 | | 291 | 6.4 | | | 5 |
| 94.65 | 4.50 | | | 0.35 | 0.25 | | | 0 | 0 | | | 0 | 0.15 | | | 0 | 0 | | | 0 | 0 | | | 0.10 | | 25 | | 329 | 6.2 | | |
| 93.65 | 5.50 | | | 0.35 | 0.25 | | | 0 | 0 | | | 0 | 0.15 | | | 0 | 0 | | | 0 | 0 | | | 0.10 | | 25 | | 345 | 5.2 | | |
| 93.15 | 4.50 | | | 0.35 | 0.25 | | | 0 | 0 | | | 0 | 0.15 | | | 1.50 | 0 | | | 0 | 0 | | | 0.10 | | 25 | | 332 | 5.1 | | |
| 91.65 | 4.50 | | | 0.35 | 0.25 | | | 0 | 0 | | | 0 | 0.15 | | | 3.00 | 0 | | | 0 | 0 | | | 0.10 | | 25 | | 268 | 3.1 | | |
| 94.21 | 4.71 | | | 0.33 | 0 | | | 0.20 | 0 | | | 0 | 0.15 | | | 0.09 | 0.14 | | | 0.17 | 0 | | | 0 | | 25 | | 349 | 15 | | | 17 |
| 94.10 | 4.74 | | | 0.33 | 0.09 | | | 0.22 | 0 | | | 0 | 0.14 | | | 0.08 | 0.13 | | | 0.17 | 0 | | | 0 | | 25 | | 440 | 8 | | |
| 93.94 | 4.74 | | | 0.32 | 0.23 | | | 0.20 | 0 | | | 0 | 0.15 | | | 0.10 | 0.14 | | | 0.18 | 0 | | | 0 | | 25 | | 425 | 2.4 | | |
| 94.05 | 4.74 | | | 0.33 | 0.13 | | | 0.21 | 0 | | | 0 | 0.15 | | | 0.09 | 0.13 | | | 0.17 | 0 | | | 0 | | 25 | | 466 | 6.6 | | |
| 93.98 | 4.74 | | | 0.33 | 0.19 | | | 0.20 | 0 | | | 0 | 0.15 | | | 0.10 | 0.14 | | | 0.17 | 0 | | | 0 | | 25 | | 450 | 4.2 | | |
| 92.30 | 6.45 | | | 0.66 | 0 | | | 0 | 0 | | | 0 | 0.55 | | | 0.04 | 0 | | | 0 | 0 | | | 0 | | 25 | | 310 | 3.9 | | | 18 |
| 91.79 | 6.47 | | | 0.62 | 0 | | | 0 | 0 | | | 0 | 0.54 | | | 0.58 | 0 | | | 0 | 0 | | | 0 | | 25 | | 290 | 3 | | |
| 91.21 | 6.50 | | | 0.63 | 0 | | | 0 | 0 | | | 0 | 0.53 | | | 1.13 | 0 | | | 0 | 0 | | | 0 | | 25 | | 280 | 2.5 | | |
| 90.79 | 6.52 | | | 0.63 | 0 | | | 0 | 0 | | | 0 | 0.56 | | | 1.50 | 0 | | | 0 | 0 | | | 0 | | 25 | | 200 | 1 | | |
| 92.45 | 6.00 | | | 0.40 | 0.45 | | | 0.10 | 0.50 | | | 0 | 0 | | | 0 | 0.10 | | | 0 | 0 | | | 0 | | 25 | | 534 | 13.4 | | | 19 |
| 90.45 | 8.00 | | | 0.40 | 0.45 | | | 0.10 | 0.50 | | | 0 | 0 | | | 0 | 0.10 | | | 0 | 0 | | | 0 | | 25 | | 559 | 12.5 | | |
| 94.45 | 4.00 | | | 0.40 | 0.45 | | | 0.10 | 0.50 | | | 0 | 0 | | | 0 | 0.10 | | | 0 | 0 | | | 0 | | 25 | | 434 | 17.9 | | |
| 94.43 | 3.00 | | | 0 | 0.42 | | | 0 | 0.32 | | | 0 | 0.06 | | | 0 | 0.11 | | | 0 | 1.40 | | | 0.26 | | 25 | | 451 | 9.1 | | | 20 |
| 93.60 | 4.80 | | | 0.65 | 0.35 | | | 0.04 | 0.50 | | | 0 | 0 | | | 0 | 0.06 | | | 0 | 0 | | | 0 | | 25 | | 466 | 11.6 | | | 21 |
| 93.11 | 4.81 | | | 0.63 | 0.83 | | | 0.02 | 0.54 | | | 0 | 0 | | | 0 | 0.06 | | | 0 | 0 | | | 0 | | 25 | | 521 | 10.4 | | |
| 92.46 | 4.91 | | | 0.66 | 1.27 | | | 0.03 | 0.58 | | | 0 | 0 | | | 0 | 0.09 | | | 0 | 0 | | | 0 | | 25 | | 518 | 16.3 | | |
| 93.07 | 5.56 | | | 0 | 0.53 | | | 0 | 0.84 | | | 0 | 0 | | | 0 | 0 | | | 0 | 0 | | | 0 | | 25 | | 487 | 10.3 | | | 9 |
| 92.23 | 5.60 | | | 0 | 0.94 | | | 0 | 1.23 | | | 0 | 0 | | | 0 | 0 | | | 0 | 0 | | | 0 | | 25 | | 533 | 8.4 | | |
| 93.35 | 5.30 | | | 0.30 | 0.40 | | | 0 | 0.50 | | | 0 | 0 | | | 0 | 0.15 | | | 0 | 0 | | | 0 | | 25 | | 459 | 10.1 | | | 22 |
| 92.95 | 5.30 | | | 0.30 | 0.80 | | | 0 | 0.50 | | | 0 | 0 | | | 0 | 0.15 | | | 0 | 0 | | | 0 | | 25 | | 487 | 9.7 | | |
| 92.55 | 5.30 | | | 0.30 | 1.20 | | | 0 | 0.50 | | | 0 | 0 | | | 0 | 0.15 | | | 0 | 0 | | | 0 | | 25 | | 486 | 11 | | |
| 93.43 | 5.31 | | | 0.29 | 0.82 | | | 0 | 0 | | | 0 | 0 | | | 0 | 0.15 | | | 0 | 0 | | | 0 | | 25 | | 457 | 10.1 | | | 23 |
| 92.96 | 5.33 | | | 0.30 | 0.79 | | | 0 | 0.48 | | | 0 | 0 | | | 0 | 0.14 | | | 0 | 0 | | | 0 | | 25 | | 487 | 8.7 | | |
| 93.49 | 3.70 | | | 0.30 | 0.37 | | | 0 | 0 | | | 0 | 0 | | | 0 | 0.14 | | | 0 | 1.50 | | | 0.50 | | 25 | | 493 | 12.5 | | | 24 |
| 93.33 | 4.82 | | | 0.29 | 0.73 | | | 0.05 | 0.57 | | | 0 | 0.03 | | | 0.03 | 0.15 | | | 0 | 0 | | | 0 | | 25 | | 483 | 9.6 | | | 25 |
| 93.51 | 4.88 | | | 0.27 | 0.72 | | | 0.04 | 0.36 | | | 0 | 0.02 | | | 0.04 | 0.16 | | | 0 | 0 | | | 0 | | 25 | | 476 | 10.2 | | |
| 93.79 | 4.75 | | | 0.26 | 0.80 | | | 0.05 | 0.14 | | | 0 | 0.03 | | | 0.02 | 0.16 | | | 0 | 0 | | | 0 | | 25 | | 468 | 10.5 | | |
| 91.87 | 6.45 | | | 0.29 | 0.65 | | | 0.09 | 0.46 | | | 0 | 0.04 | | | 0.01 | 0.14 | | | 0 | 0 | | | 0 | | 25 | | 503 | 9 | | | 26 |
| 91.53 | 6.46 | | | 0.24 | 0.67 | | | 0.04 | 0.88 | | | 0 | 0.03 | | | 0.02 | 0.13 | | | 0 | 0 | | | 0 | | 25 | | 530 | 7 | | |
| 94.27 | 3.95 | | | 0.02 | 0.32 | | | 0 | 0.28 | | | 0 | 0.06 | | | 0 | 0.15 | | | 0 | 0.96 | | | 0 | | 25 | | 378 | 21.6 | | | 27 |
| 91.60 | 6.85 | | | 0.20 | 0.01 | | | 0.06 | 0 | | | 0 | 0.60 | | | 0 | 0 | | | 0 | 0 | | | 0.68 | | 25 | | 420 | 9 | | | 6 |
| 91.53 | 6.78 | | | 0.19 | 0.01 | | | 0.08 | 0.03 | | | 0 | 0.62 | | | 0 | 0 | | | 0 | 0 | | | 0.76 | | 25 | | 410 | 3 | | |
| 92.08 | 6.37 | | | 0.18 | 0.01 | | | 0.06 | 0.07 | | | 0 | 0.57 | | | 0 | 0 | | | 0 | 0 | | | 0.66 | | 25 | | 475 | 11 | | |
| 91.51 | 6.84 | | | 0.18 | 0.01 | | | 0.02 | 0.10 | | | 0 | 0.61 | | | 0 | 0 | | | 0 | 0 | | | 0.73 | | 25 | | 400 | 1 | | |
| 93.51 | 4.45 | | | 0.54 | 1.50 | | | 0 | 0 | | | 0 | 0 | | | 0 | 0 | | | 0 | 0 | | | 0 | | 25 | | 496 | 10.7 | | | 28 |
| 93.12 | 4.95 | | | 0.62 | 0.60 | | | 0.03 | 0.48 | | | 0 | 0.04 | | | 0.01 | 0.09 | | | 0 | 0 | | | 0.06 | | 25 | | 480 | 11 | | | 29 |
| 93.13 | 4.89 | | | 0.60 | 0.61 | | | 0.02 | 0.45 | | | 0 | 0.03 | | | 0.01 | 0.06 | | | 0.13 | 0 | | | 0.06 | | 25 | | 488 | 10.2 | | |
| 92.90 | 4.93 | | | 0.60 | 0.65 | | | 0.02 | 0.46 | | | 0 | 0.04 | | | 0.01 | 0.08 | | | 0.25 | 0 | | | 0.07 | | 25 | | 469 | 11.9 | | |
| 90.45 | 8.00 | | | 0.40 | 0.45 | | | 0.10 | 0.50 | | | 0 | 0 | | | 0 | 0.10 | | | 0 | 0 | | | 0 | | 200 | | 371 | 15.3 | | | 19 |
| 92.45 | 6.00 | | | 0.40 | 0.45 | | | 0.10 | 0.50 | | | 0 | 0 | | | 0 | 0.10 | | | 0 | 0 | | | 0 | | 200 | | 363 | 19 | | |
| 94.45 | 4.00 | | | 0.40 | 0.45 | | | 0.10 | 0.50 | | | 0 | 0 | | | 0 | 0.10 | | | 0 | 0 | | | 0 | | 200 | | 321 | 23.4 | | |
| 93.33 | 4.82 | | | 0.29 | 0.73 | | | 0.05 | 0.57 | | | 0 | 0.03 | | | 0.03 | 0.15 | | | 0 | 0 | | | 0 | | 200 | | 375 | 10.1 | | | 25 |
| 93.51 | 4.88 | | | 0.27 | 0.72 | | | 0.04 | 0.36 | | | 0 | 0.02 | | | 0.04 | 0.16 | | | 0 | 0 | | | 0 | | 200 | | 361 | 11.2 | | |
| 93.79 | 4.75 | | | 0.26 | 0.80 | | | 0.05 | 0.14 | | | 0 | 0.03 | | | 0.02 | 0.16 | | | 0 | 0 | | | 0 | | 200 | | 350 | 12.5 | | |
| 91.87 | 6.45 | | | 0.29 | 0.65 | | | 0.09 | 0.46 | | | 0 | 0.04 | | | 0.01 | 0.14 | | | 0 | 0 | | | 0 | | 200 | | 409 | 16 | | | 26 |
| 91.53 | 6.46 | | | 0.24 | 0.67 | | | 0.04 | 0.88 | | | 0 | 0.03 | | | 0.02 | 0.13 | | | 0 | 0 | | | 0 | | 200 | | 430 | 12.5 | | |
| 90.45 | 8.00 | | | 0.40 | 0.45 | | | 0.10 | 0.50 | | | 0 | 0 | | | 0 | 0.10 | | | 0 | 0 | | | 0 | | 250 | | 306 | 15.8 | | | 19 |
| 92.45 | 6.00 | | | 0.40 | 0.45 | | | 0.10 | 0.50 | | | 0 | 0 | | | 0 | 0.10 | | | 0 | 0 | | | 0 | | 250 | | 274 | 21 | | |
| 94.45 | 4.00 | | | 0.40 | 0.45 | | | 0.10 | 0.50 | | | 0 | 0 | | | 0 | 0.10 | | | 0 | 0 | | | 0 | | 250 | | 258 | 25.8 | | |
| 93.35 | 5.30 | | | 0.30 | 0.40 | | | 0 | 0.50 | | | 0 | 0 | | | 0 | 0.15 | | | 0 | 0 | | | 0 | | 250 | | 272 | 14.6 | | | 22 |
| 92.95 | 5.30 | | | 0.30 | 0.80 | | | 0 | 0.50 | | | 0 | 0 | | | 0 | 0.15 | | | 0 | 0 | | | 0 | | 250 | | 306 | 14.2 | | |
| 92.55 | 5.30 | | | 0.30 | 1.20 | | | 0 | 0.50 | | | 0 | 0 | | | 0 | 0.15 | | | 0 | 0 | | | 0 | | 250 | | 319 | 12.7 | | |
| 93.43 | 5.31 | | | 0.29 | 0.82 | | | 0 | 0 | | | 0 | 0 | | | 0 | 0.15 | | | 0 | 0 | | | 0 | | 250 | | 266 | 15 | | | 23 |
| 92.96 | 5.33 | | | 0.30 | 0.79 | | | 0 | 0.48 | | | 0 | 0 | | | 0 | 0.14 | | | 0 | 0 | | | 0 | | 250 | | 306 | 14.2 | | |
| 93.33 | 4.82 | | | 0.29 | 0.73 | | | 0.05 | 0.57 | | | 0 | 0.03 | | | 0.03 | 0.15 | | | 0 | 0 | | | 0 | | 250 | | 315 | 11.4 | | | 25 |
| 93.51 | 4.88 | | | 0.27 | 0.72 | | | 0.04 | 0.36 | | | 0 | 0.02 | | | 0.04 | 0.16 | | | 0 | 0 | | | 0 | | 250 | | 280 | 14 | | |
| 93.79 | 4.75 | | | 0.26 | 0.80 | | | 0.05 | 0.14 | | | 0 | 0.03 | | | 0.02 | 0.16 | | | 0 | 0 | | | 0 | | 250 | | 265 | 15.5 | | |
| 91.87 | 6.45 | | | 0.29 | 0.65 | | | 0.09 | 0.46 | | | 0 | 0.04 | | | 0.01 | 0.14 | | | 0 | 0 | | | 0 | | 250 | | 322 | 19 | | | 26 |
| 91.53 | 6.46 | | | 0.24 | 0.67 | | | 0.04 | 0.88 | | | 0 | 0.03 | | | 0.02 | 0.13 | | | 0 | 0 | | | 0 | | 250 | | 325 | 16 | | |
| 94.35 | 4.54 | | | 0.92 | 0 | | | 0 | 0 | | | 0 | 0.13 | | | 0.06 | 0 | | | 0 | 0 | | | 0 | | 300 | | 116 | 8.3 | | | 2 |
| 96.77 | 2.04 | | | 1.00 | 0 | | | 0 | 0 | | | 0 | 0.13 | | | 0.06 | 0 | | | 0 | 0 | | | 0 | | 300 | | 53 | 11 | | |
| 91.38 | 7.41 | | | 1.01 | 0 | | | 0 | 0 | | | 0 | 0.14 | | | 0.06 | 0 | | | 0 | 0 | | | 0 | | 300 | | 134 | 10 | | |
| 94.69 | 5.30 | | | 0 | 0 | | | 0 | 0 | | | 0 | 0.01 | | | 0 | 0 | | | 0 | 0 | | | 0 | | 300 | | 80.7 | 14.1 | | | 9 |
| 94.42 | 5.20 | | | 0.21 | 0 | | | 0 | 0 | | | 0 | 0.02 | | | 0 | 0.15 | | | 0 | 0 | | | 0 | | 300 | | 117.5 | 8.5 | | |
| 94.21 | 4.71 | | | 0.33 | 0 | | | 0.20 | 0 | | | 0 | 0.15 | | | 0.09 | 0.14 | | | 0.17 | 0 | | | 0 | | 300 | | 149 | 15 | | | 17 |
| 94.10 | 4.74 | | | 0.33 | 0.09 | | | 0.22 | 0 | | | 0 | 0.14 | | | 0.08 | 0.13 | | | 0.17 | 0 | | | 0 | | 300 | | 166 | 12 | | |
| 94.05 | 4.74 | | | 0.33 | 0.13 | | | 0.21 | 0 | | | 0 | 0.15 | | | 0.09 | 0.13 | | | 0.17 | 0 | | | 0 | | 300 | | 150 | 18 | | |
| 93.98 | 4.74 | | | 0.33 | 0.19 | | | 0.20 | 0 | | | 0 | 0.15 | | | 0.10 | 0.14 | | | 0.17 | 0 | | | 0 | | 300 | | 133 | 15 | | |
| 93.94 | 4.74 | | | 0.32 | 0.23 | | | 0.20 | 0 | | | 0 | 0.15 | | | 0.10 | 0.14 | | | 0.18 | 0 | | | 0 | | 300 | | 130 | 12 | | |
| 90.45 | 8.00 | | | 0.40 | 0.45 | | | 0.10 | 0.50 | | | 0 | 0 | | | 0 | 0.10 | | | 0 | 0 | | | 0 | | 300 | | 228 | 16.1 | | | 19 |
| 92.45 | 6.00 | | | 0.40 | 0.45 | | | 0.10 | 0.50 | | | 0 | 0 | | | 0 | 0.10 | | | 0 | 0 | | | 0 | | 300 | | 185 | 24.5 | | |
| 94.45 | 4.00 | | | 0.40 | 0.45 | | | 0.10 | 0.50 | | | 0 | 0 | | | 0 | 0.10 | | | 0 | 0 | | | 0 | | 300 | | 141 | 26.1 | | |
| 93.33 | 4.82 | | | 0.29 | 0.73 | | | 0.05 | 0.57 | | | 0 | 0.03 | | | 0.03 | 0.15 | | | 0 | 0 | | | 0 | | 300 | | 180 | 13.6 | | | 25 |
| 93.51 | 4.88 | | | 0.27 | 0.72 | | | 0.04 | 0.36 | | | 0 | 0.02 | | | 0.04 | 0.16 | | | 0 | 0 | | | 0 | | 300 | | 177 | 16.5 | | |
| 93.79 | 4.75 | | | 0.26 | 0.80 | | | 0.05 | 0.14 | | | 0 | 0.03 | | | 0.02 | 0.16 | | | 0 | 0 | | | 0 | | 300 | | 176 | 17.6 | | |
| 92.96 | 5.33 | | | 0.30 | 0.79 | | | 0 | 0.48 | | | 0 | 0 | | | 0 | 0.14 | | | 0 | 0 | | | 0 | | 300 | | 185 | 17.7 | | | 23 |
| 93.43 | 5.31 | | | 0.29 | 0.82 | | | 0 | 0 | | | 0 | 0 | | | 0 | 0.15 | | | 0 | 0 | | | 0 | | 300 | | 172 | 10.4 | | |
| 91.87 | 6.45 | | | 0.29 | 0.65 | | | 0.09 | 0.46 | | | 0 | 0.04 | | | 0.01 | 0.14 | | | 0 | 0 | | | 0 | | 300 | | 195 | 23 | | | 26 |
| 91.53 | 6.46 | | | 0.24 | 0.67 | | | 0.04 | 0.88 | | | 0 | 0.03 | | | 0.02 | 0.13 | | | 0 | 0 | | | 0 | | 300 | | 202 | 20 | | |
| 93.12 | 4.95 | | | 0.62 | 0.60 | | | 0.03 | 0.48 | | | 0 | 0.04 | | | 0.01 | 0.09 | | | 0 | 0 | | | 0.06 | | 300 | | 144 | 12.2 | | | 29 |
| 93.13 | 4.89 | | | 0.60 | 0.61 | | | 0.02 | 0.45 | | | 0 | 0.03 | | | 0.01 | 0.06 | | | 0.13 | 0 | | | 0.06 | | 300 | | 150 | 13.2 | | |
| 92.90 | 4.93 | | | 0.60 | 0.65 | | | 0.02 | 0.46 | | | 0 | 0.04 | | | 0.01 | 0.08 | | | 0.25 | 0 | | | 0.07 | | 300 | | 156 | 13.3 | | |

**Supplementary Table 11. | Benchmark machine-learning models and key hyperparameters used for UTS and EL prediction.** The table summarizes the implementation and target-specific hyperparameter settings of the ten benchmark models evaluated in this work. UTS and EL were modeled separately, and the listed hyperparameters correspond to the final settings used for model benchmarking.

| Model | Implementation | Key hyperparameters | Reference |
| --- | --- | --- | --- |
| NN | MLPRegressor | UTS: hidden layers = 5, hidden size = 42, learning rate = 0.014344, batch size = 39, max_iter = 800;  EL: hidden layers = 2, hidden size = 50, learning rate = 0.002652, batch size = 50, max_iter = 800 | 30 |
| XGBoost | XGBRegressor | UTS: n_estimators = 260, max_depth = 3, learning rate = 0.040, subsample = 0.70, colsample_bytree = 0.70;  EL: n_estimators = 220, max_depth = 3, learning rate = 0.030, subsample = 0.75, colsample_bytree = 0.75 | 31 |
| GBDT | GradientBoostingRegressor | UTS: n_estimators = 150, learning rate = 0.025, max_depth = 3, min_samples_leaf = 8, subsample = 0.70;  EL: n_estimators = 130, learning rate = 0.020, max_depth = 2, min_samples_leaf = 6, subsample = 0.75 | 32 |
| RF | RandomForestRegressor | UTS: n_estimators = 200, max_depth = 5, min_samples_split = 16, min_samples_leaf = 8, max_features = 0.60;  EL: n_estimators = 220, max_depth = 4, min_samples_split = 12, min_samples_leaf = 6, max_features = 0.70 | 33 |
| AdaBoost | AdaBoostRegressor | UTS: n_estimators = 250, learning rate = 0.030;  EL: n_estimators = 200, learning rate = 0.025 | 34 |
| SVR | SVR | UTS: RBF kernel, C = 50.0, gamma = scale, ε = 1.0; EL: RBF kernel, C = 18.0, gamma = scale, ε = 0.45 | 35 |
| KNN | KNeighborsRegressor | UTS: n_neighbors = 12, weights = uniform, p = 2; EL: n_neighbors = 10, weights = distance, p = 2 | 36 |
| DT | DecisionTreeRegressor | UTS: max_depth = 4, min_samples_split = 12, min_samples_leaf = 7;  EL: max_depth = 3, min_samples_split = 10, min_samples_leaf = 5 | 37 |
| LASSO | Lasso | UTS: α = 0.001, max_iter = 800;  EL: α = 0.0005, max_iter = 800 | 38 |
| Elastic Net | ElasticNet | UTS: α = 0.001, l1_ratio = 0.50, max_iter = 800; EL: α = 0.0005, l1_ratio = 0.35, max_iter = 800 | 39 |

**Supplementary references**

1 Qin, J. *et al.* The effect of Sc addition on microstructure and mechanical properties of as-cast Zr-containing Al-Cu alloys. *J. Alloys Compd.* **909**, 164686 (2022).

2 Chen, J., Liao, H. & Xu, H. Uneven Precipitation Behavior during the Solutionizing Course of Al-Cu-Mn Alloys and Their Contribution to High Temperature Strength. *Adv. Mater. Sci. Eng.* **2018**, 6741502 (2018).

3 Li, J. *et al.* Development of a novel high strength and toughness Al-Cu-Li alloy casting billet with a new process. *Mater. Sci. Eng. A* **854**, 143827 (2022).

4 Xu, D., Zhu, C., Xu, C. & Chen, K. Microstructures and tensile fracture behavior of 2219 wrought Al-Cu alloys with different impurity of Fe. *Metals* **11**, 174 (2021).

5 Kang, B. K. & Sohn, I. Effects of Cu and Si contents on the fluidity, hot tearing, and mechanical properties of Al-Cu-Si alloys. *Metall. Mater. Trans. A* **49**, 5137–5145 (2018).

6 Mandal, P. K. & Robi, P. Influence of micro-alloying with silver on microstructure and mechanical properties of Al-Cu alloy. *Mater. Sci. Eng. A* **722**, 99–111 (2018).

7 Zhang, M., Wang, J., Wang, B., Xue, C. & Liu, X. Quantifying the effects of Sc and Ag on the microstructure and mechanical properties of Al-Cu alloys. *Mater. Sci. Eng. A* **831**, 142355 (2022).

8 Hu, K., Zou, C., Wang, H. & Wei, Z. Influence of Ti elements on the evolution of microstructure, mechanical properties and thermal stability of Al-Cu alloy. *J. Alloys Compd.* **952**, 169860 (2023).

9 Sun, T.-T. *et al.* Enhanced thermal stability and mechanical properties of high-temperature resistant Al-Cu alloy with Zr and Mn micro-alloying. *Trans. Nonferrous Met. Soc. China* **32**, 64–78 (2022).

10 Zeren, M. Effect of copper and silicon content on mechanical properties in Al-Cu-Si-Mg alloys. *J. Mater. Process. Technol.* **169**, 292–298 (2005).

11 Qi, F. *et al.* Microstructure and mechanical properties of cast Al-Li-Mg alloy: Role of Cu addition and heat treatment. *J. Mater. Sci. Technol.* **199**, 1–16 (2024).

12 Zhang, X., Zhang, L., Wu, G., Shi, C. & Zhang, J. Influences of Mg content on the microstructures and mechanical properties of cast Al-2Li-2Cu-0.2Zr alloy. *J. Mater. Sci.* **54**, 791–811 (2019).

13 Chen, A., Zhang, L., Wu, G., Sun, M. & Liu, W. Influences of Mn content on the microstructures and mechanical properties of cast Al-3Li-2Cu-0.2Zr alloy. *J. Alloys Compd.* **715**, 421–431 (2017).

14 Zhang, J. *et al.* Effect of Zn on precipitation evolution and mechanical properties of a high strength cast Al-Li-Cu alloy. *Mater. Charact.* **160**, 110089 (2020).

15 Guo, Y.-J. *et al.* Effect of Ti content on microstructures and mechanical properties of cast Al-2Li-2Cu-0.5Mg alloy. *China Foundry* **20**, 179–188 (2023).

16 Gao, Y. *et al.* Assembling dual precipitates to improve high-temperature resistance of multi-microalloyed Al-Cu alloys. *J. Alloys Compd.* **822**, 153629 (2020).

17 Rakhmonov, J., Liu, K., Pan, L., Breton, F. & Chen, X.-G. Enhanced mechanical properties of high-temperature-resistant Al-Cu cast alloy by microalloying with Mg. *J. Alloys Compd.* **827**, 154305 (2020).

18 Xu, R. *et al.* Microstructure evolution and mechanical properties of Al-6.5Cu-0.6Mn-0.5Fe alloys with different Si additions. *Trans. Nonferrous Met. Soc. China* **29**, 1583–1591 (2019).

19 Xiao, D., Wang, J., Ding, D. & Chen, S. Effect of Cu content on the mechanical properties of an Al-Cu-Mg-Ag alloy. *J. Alloys Compd.* **343**, 77–81 (2002).

20 Chen, X. *et al.* Effects of heat treatment on the microstructure and mechanical properties of extruded 2196 Al-Cu-Li alloy. *Mater. Des.* **192**, 108746 (2020).

21 Chen, J. *et al.* Effect of Mg content on microstructure, mechanical properties and intergranular corrosion properties of Al-Cu-Mg-Ag alloys. *Mater. Today Commun.* **34**, 105363 (2023).

22 Liu, X. Y. *et al.* Effects of Mg content on the mechanical properties and corrosion resistance of Al-Cu-Mg-Ag alloy. *J. Alloys Compd.* **685**, 209–215 (2016).

23 Liu, X. Y. *et al.* Microstructure and mechanical properties of Al-Cu-Mg-Mn-Zr alloy with trace amounts of Ag. *Mater. Sci. Eng. A* **525**, 128–132 (2009).

24 Li, H. *et al.* Effect of different aging processes on the microstructure and mechanical properties of a novel Al-Cu-Li alloy. *J. Mater. Sci. Technol.* **32**, 1049–1053 (2016).

25 Zhou, X., Liu, Z., Bai, S., Liu, M. & Ying, P. The influence of various Ag additions on the nucleation and thermal stability of Ω phase in Al-Cu-Mg alloys. *Mater. Sci. Eng. A* **564**, 186–191 (2013).

26 Bai, S. *et al.* Effects of Ag variations on the microstructures and mechanical properties of Al-Cu-Mg alloys at elevated temperatures. *Mater. Sci. Eng. A* **611**, 69–76 (2014).

27 He, G. *et al.* Effect of heat treatment on the microstructure and mechanical properties of cryogenic rolling 2195 Al-Cu-Li alloy. *Mater. Sci. Eng. A* **822**, 141682 (2021).

28 Huang, Y., Chen, Z. & Zheng, Z. A conventional thermo-mechanical process of Al-Cu-Mg alloy for increasing ductility while maintaining high strength. *Scr. Mater.* **64**, 382–385 (2011).

29 Ling, K. *et al.* Effect of V additions on the microstructure and mechanical properties of Al-Cu-Mg-Ag alloy. *Mater. Today Commun.* **33**, 104197 (2022).

30 Rumelhart, D. E., Hinton, G. E. & Williams, R. J. Learning representations by back-propagating errors. *Nature* **323**, 533–536 (1986).

31 Chen, T. & Guestrin, C. XGBoost: A scalable tree boosting system. In Proc. 22nd ACM SIGKDD International Conference on Knowledge Discovery and Data Mining, KDD’16 785–794 (ACM, New York, NY, USA, 2016).

32 Friedman, J. H. Greedy function approximation: a gradient boosting machine. *Ann. Stat.* **29**, 1189–1232 (2001).

33 Breiman, L. Random forests. *Mach. Learn.* **45**, 5–32 (2001).

34 Freund, Y. & Schapire, R. E. A decision-theoretic generalization of on-line learning and an application to boosting. *J. Comput. Syst. Sci.* **55**, 119–139 (1997).

35 Drucker, H., Burges, C. J. C., Kaufman, L., Smola, A. J. & Vapnik, V. Support vector regression machines. *Adv. Neural Inf. Process. Syst.* **9**, 155–161 (1996).

36 Cover, T. & Hart, P. Nearest neighbor pattern classification. *IEEE Trans. Inf. Theory* **13**, 21–27 (1967).

37 Breiman, L., Friedman, J., Olshen, R. A. & Stone, C. J. *Classification and Regression Trees* (Wadsworth, Belmont, CA, 1984).

38 Tibshirani, R. Regression shrinkage and selection via the lasso. *J. R. Stat. Soc. Ser. B Stat. Methodol.* **58**, 267–288 (1996).

39 Zou, H. & Hastie, T. Regularization and variable selection via the elastic net. *J. R. Stat. Soc. Ser. B Stat. Methodol.* **67**, 301–320 (2005).
